# Supplementary material for: Coal-derived graphene quantum dots with a Mn2+/Mn7+ nanosensor for selective detection of glutathione by a fluorescence switch-off–on assay
Source: Royal Society of Chemistry journal article supplement (doi:10.1039/d2nj00220e), 2022-01-01
Supplement: d2nj00220e1.pdf [file d2nj00220e1.pdf]

**Supporting Information**

**Coal derived graphene quantum dots with Mn<sup>2+</sup>/Mn<sup>7+</sup> nanosensor for selective detection of glutathione by a fluorescence switch-off-on assay**

Aayushi Kundu<sup>a</sup>, Banibrata Maity<sup>a\*</sup> and Soumen Basu<sup>a\*</sup>

*<sup>a</sup>School of Chemistry and Biochemistry, Affiliate Faculty—TIET-Virginia Tech Center of Excellence in Emerging Materials, Thapar Institute of Engineering and Technology, Patiala-147004, India*

\*Corresponding Author E-mail: [banibrata.maity@thapar.edu](mailto:banibrata.maity@thapar.edu) (B. Maity);  
[soumen.basu@thapar.edu](mailto:soumen.basu@thapar.edu) (S. Basu)

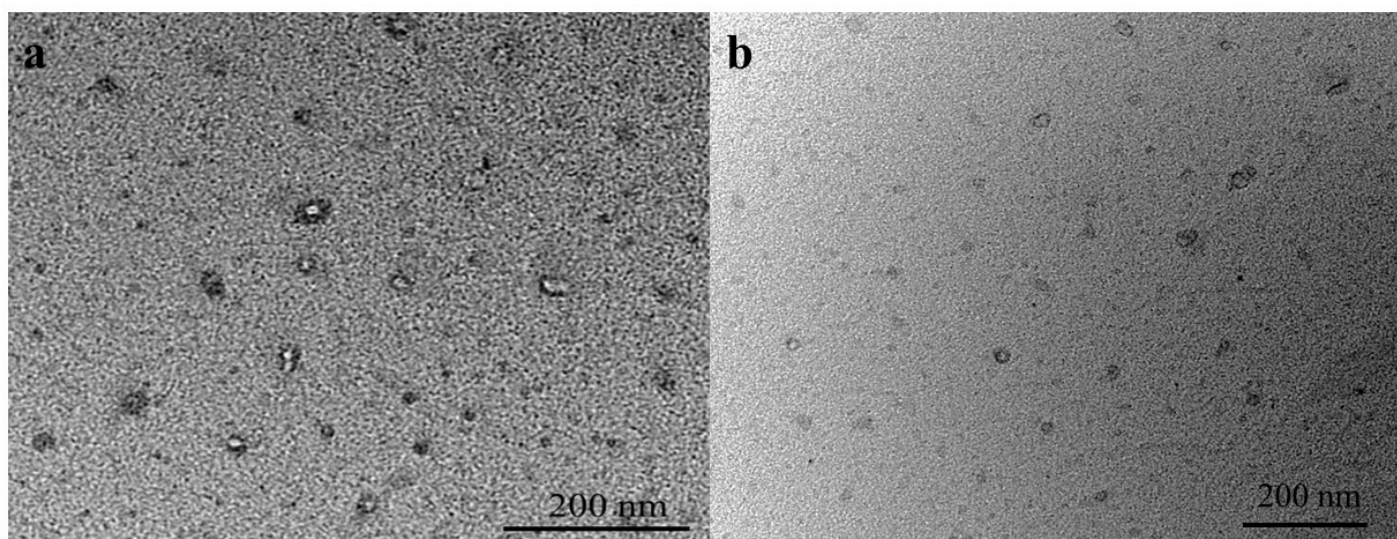

**Fig. S1.** TEM image of (a) A-GQDs and (b) B-GQDs.

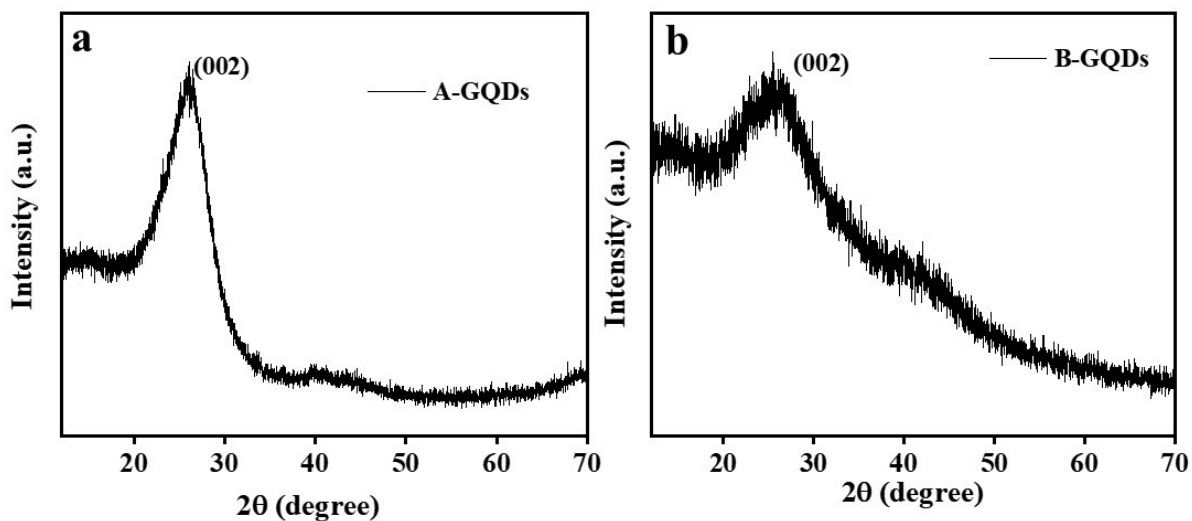

Fig. S2. XRD spectra of (a) A-GQDs and (b) B-GQDs.

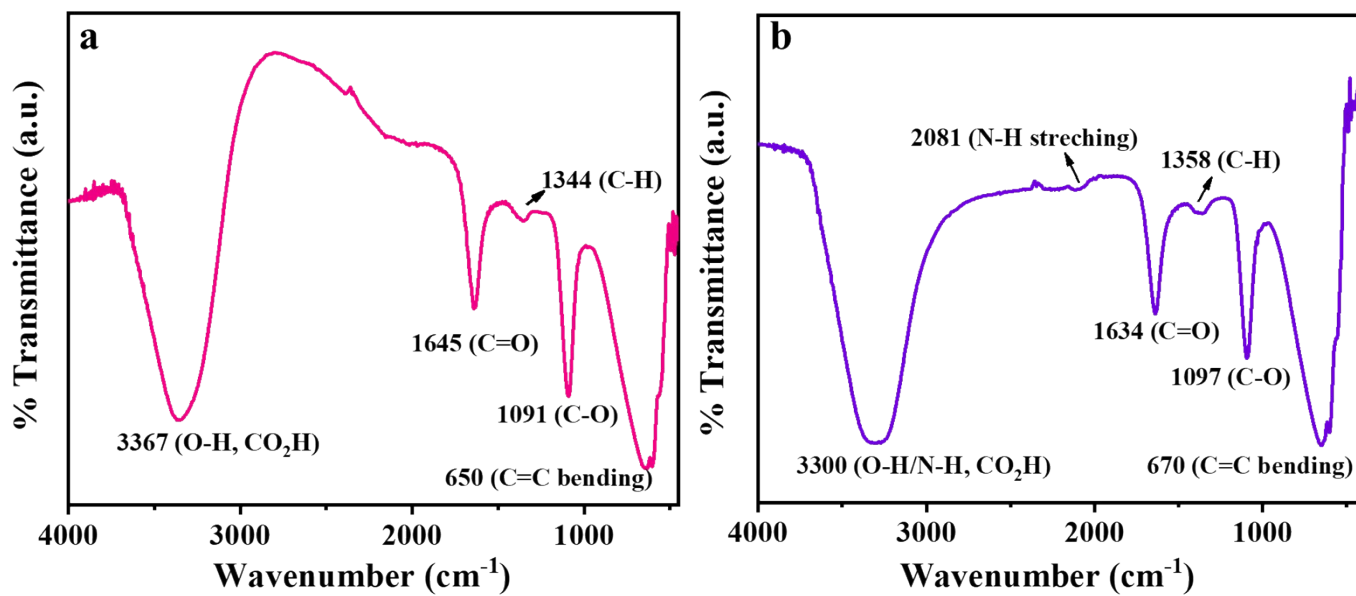

Fig. S3. FTIR spectra of (a) A-GQDs and (b) B-GQDs.

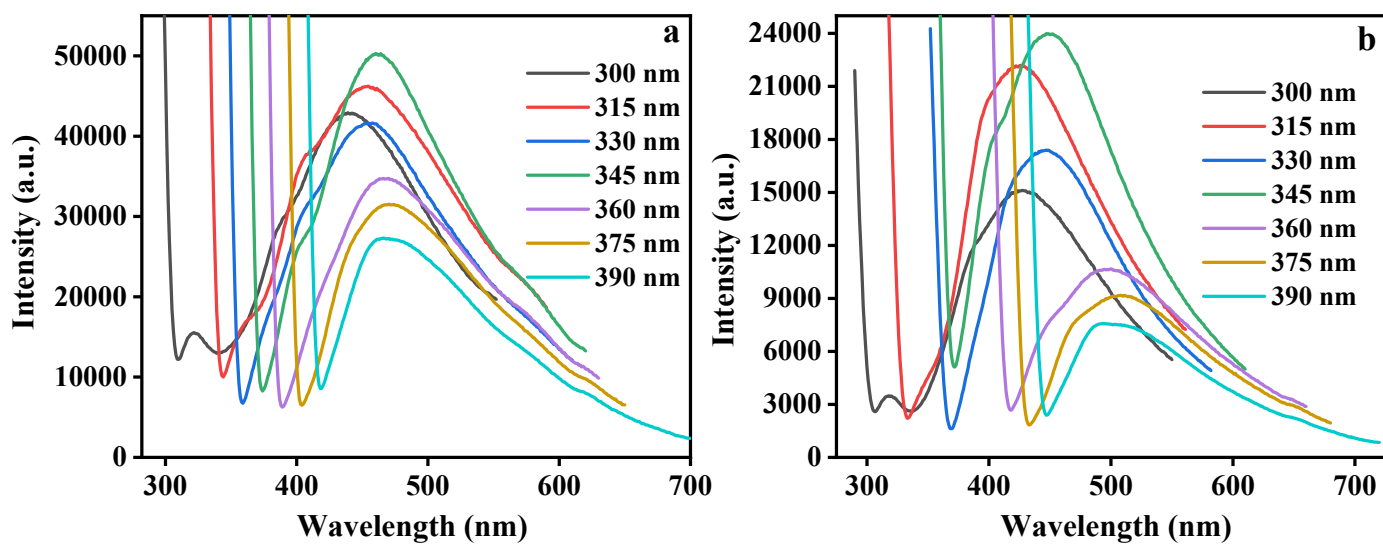

**Fig. S4.** PL spectra of (a) A-GQDs, (b) B-GQDs at different excitation wavelength.

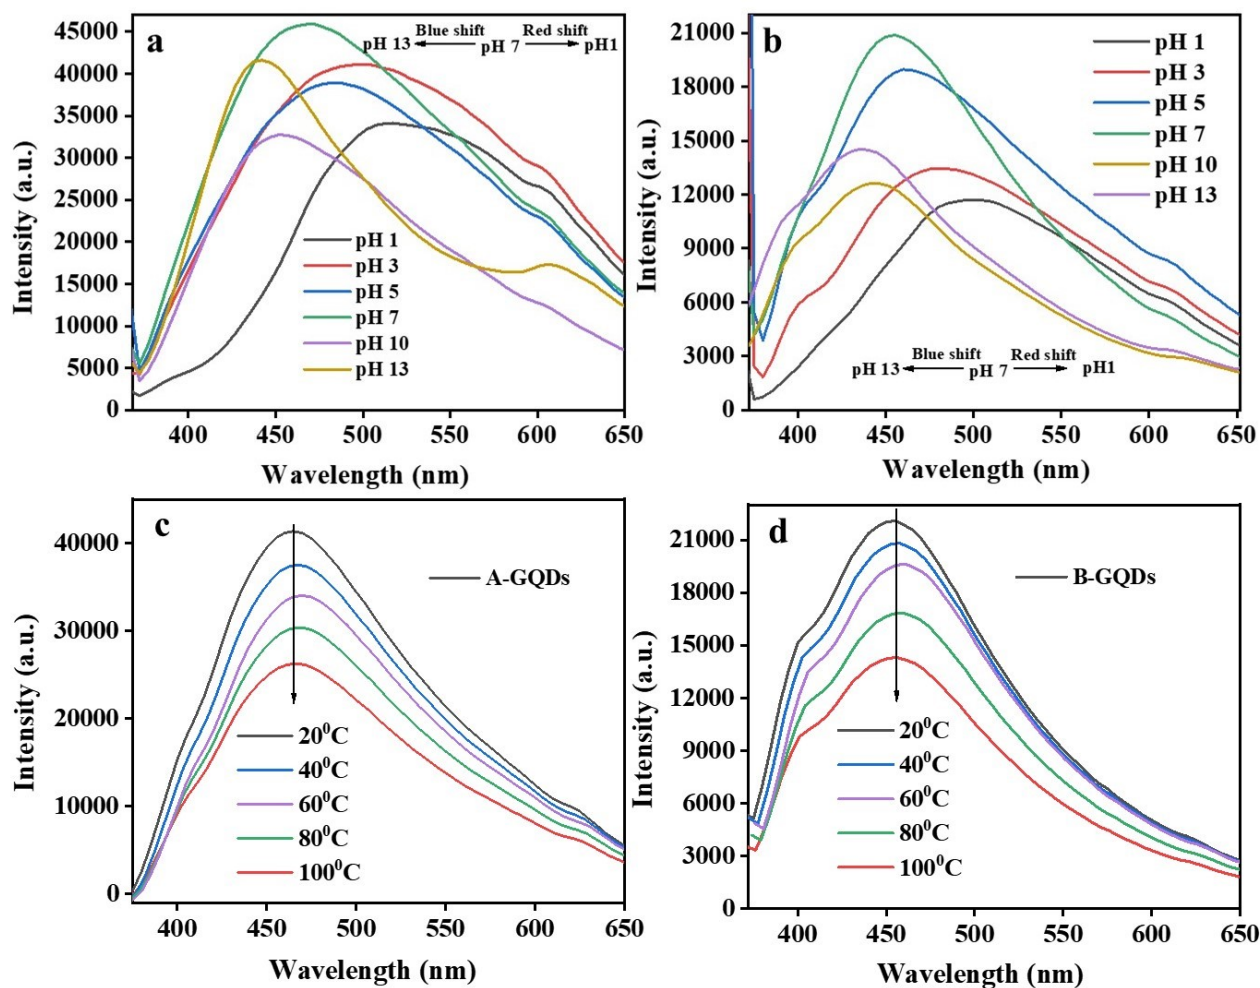

S.

Fig. S5. Effect of pH on (a) A-GQDs, (b) B-GQDs, effect of temperature on the fluorescence of (c) A-GQDs, and (d) B-GQDs.

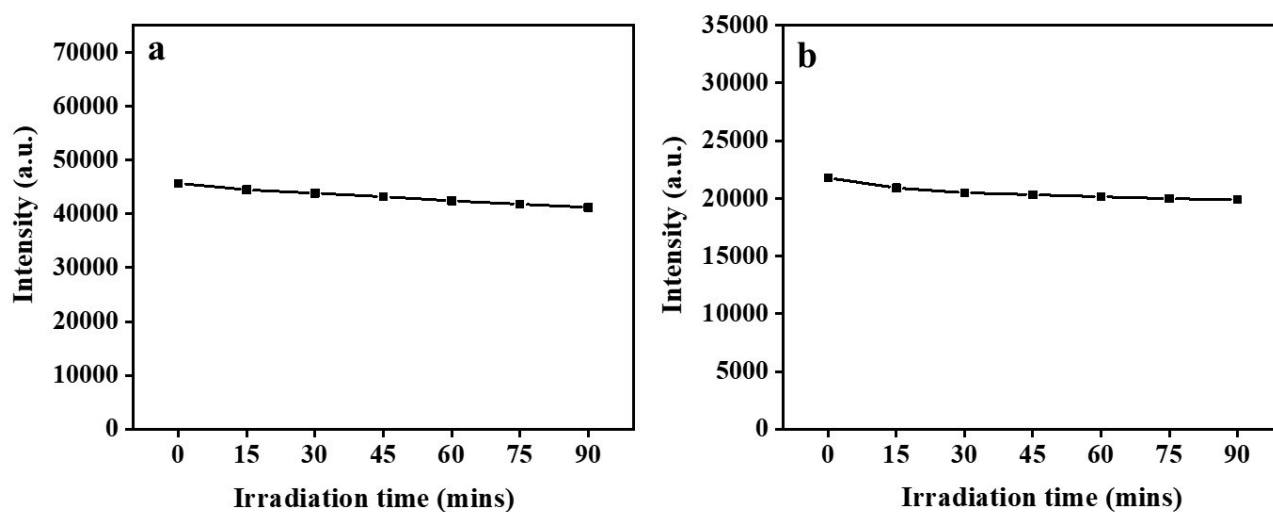

Fig.S6. The effect of irradiation time on the PL intensity of (a) A-GQDs, and (b) B-GQDs.

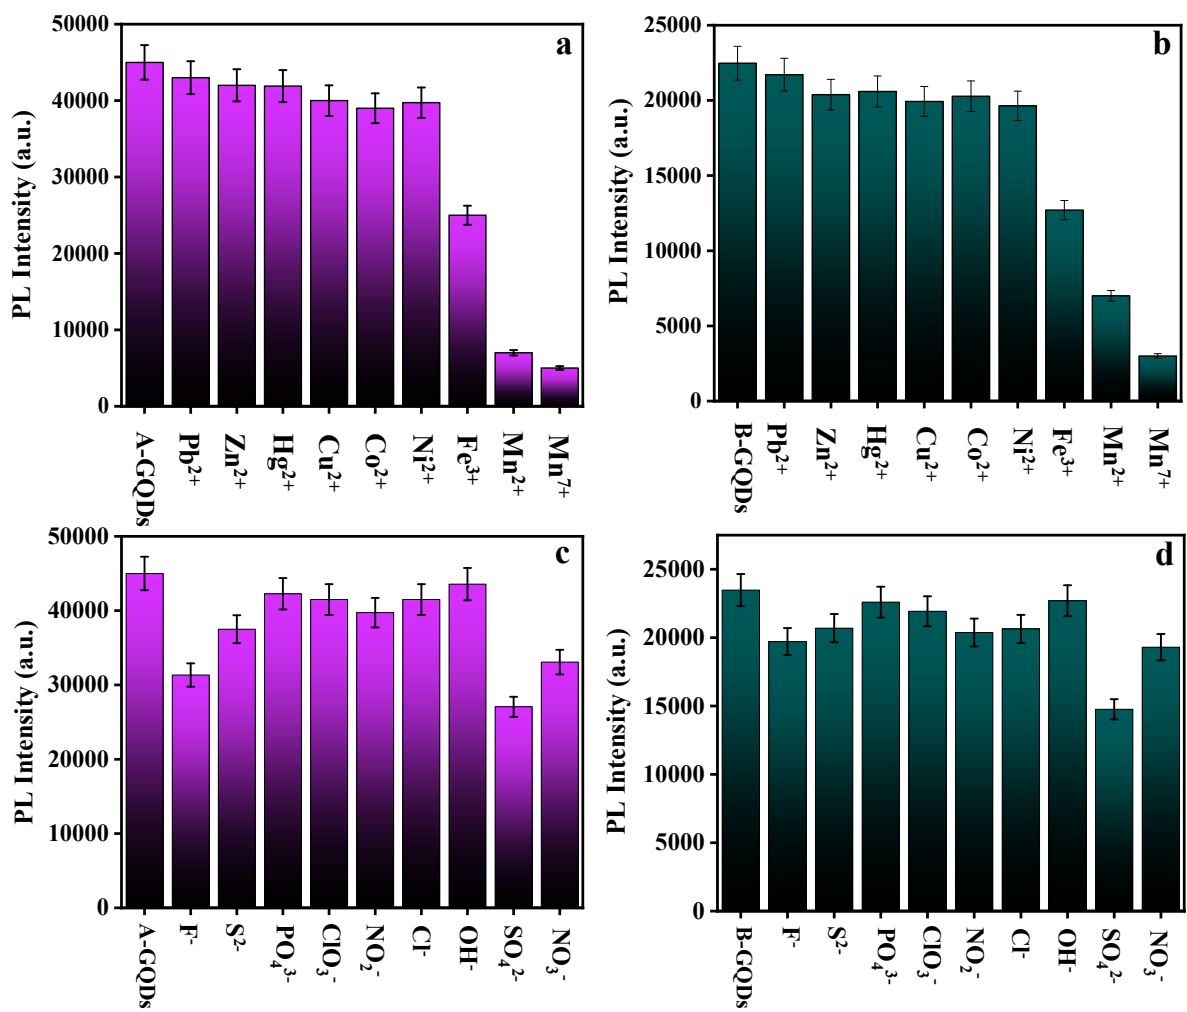

**Fig. S7.** Fluorescence response studies of (a) A-GQDs, (b) B-GQDs with cations, (c) A-GQDs, and (d) B-GQDs with anions.

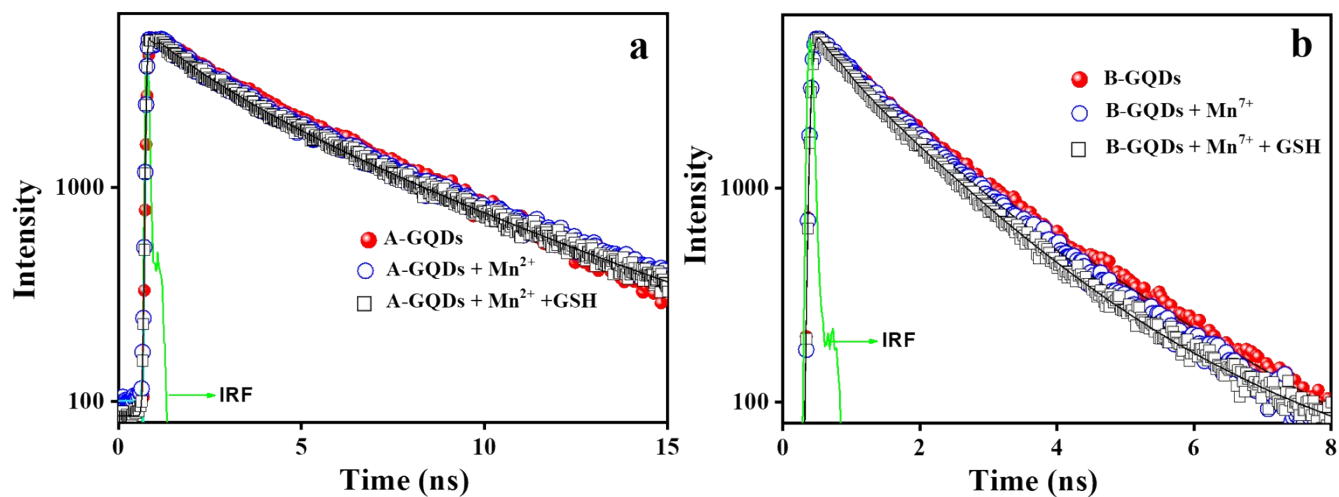

**Fig. S8.** Time-resolved fluorescence emission decays of (a) A-GQDs with Mn<sup>2+</sup> and GSH, (b) B-GQDs with Mn<sup>7+</sup> and GSH.

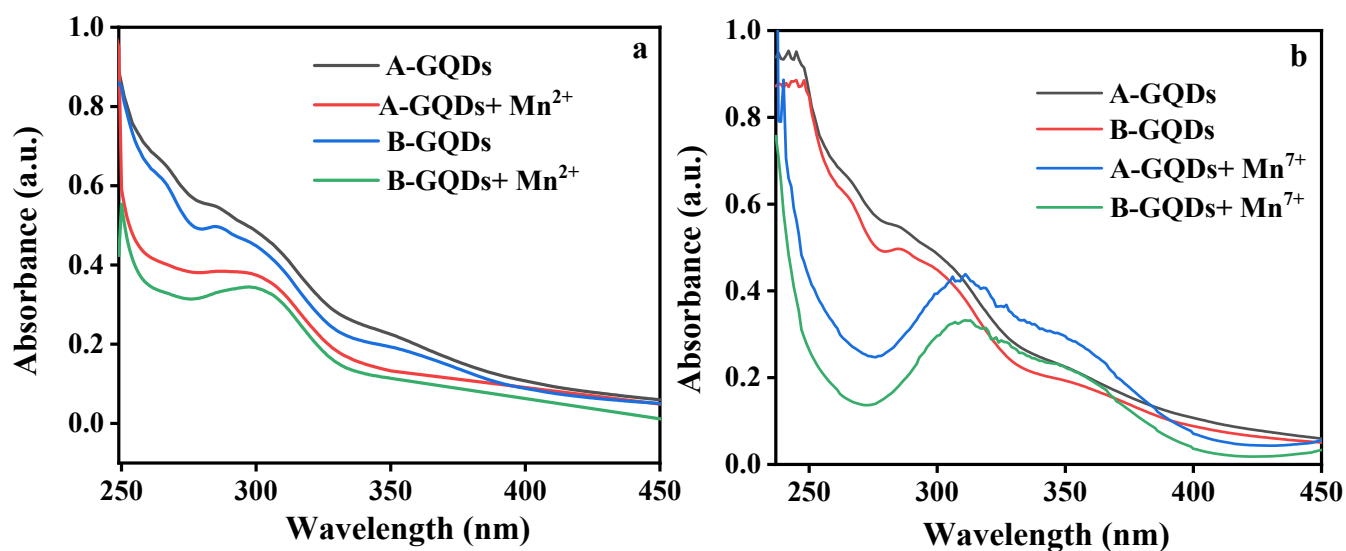

**Fig. S9.** UV-Visible absorption spectrum of A-GQDs and B-GQDs before and after the addition of (a) Mn<sup>2+</sup>, and (b) Mn<sup>7+</sup>.

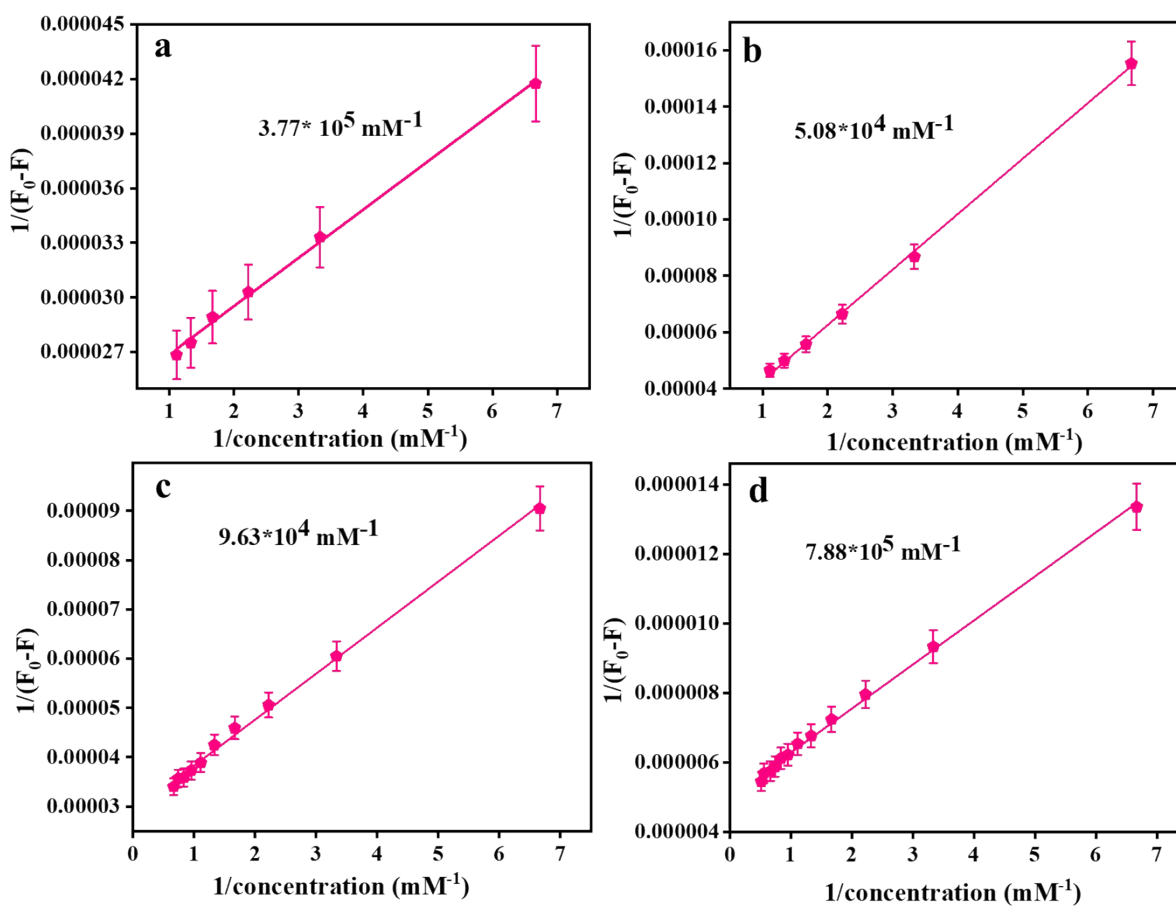

**Fig. S10.** B-H binding plot of (a) A-GQDs with  $\text{Mn}^{2+}$ , (b) B-GQDs with  $\text{Mn}^{2+}$ , (c) A-GQDs with  $\text{Mn}^{7+}$ , and (d) B-GQDs with  $\text{Mn}^{7+}$ .

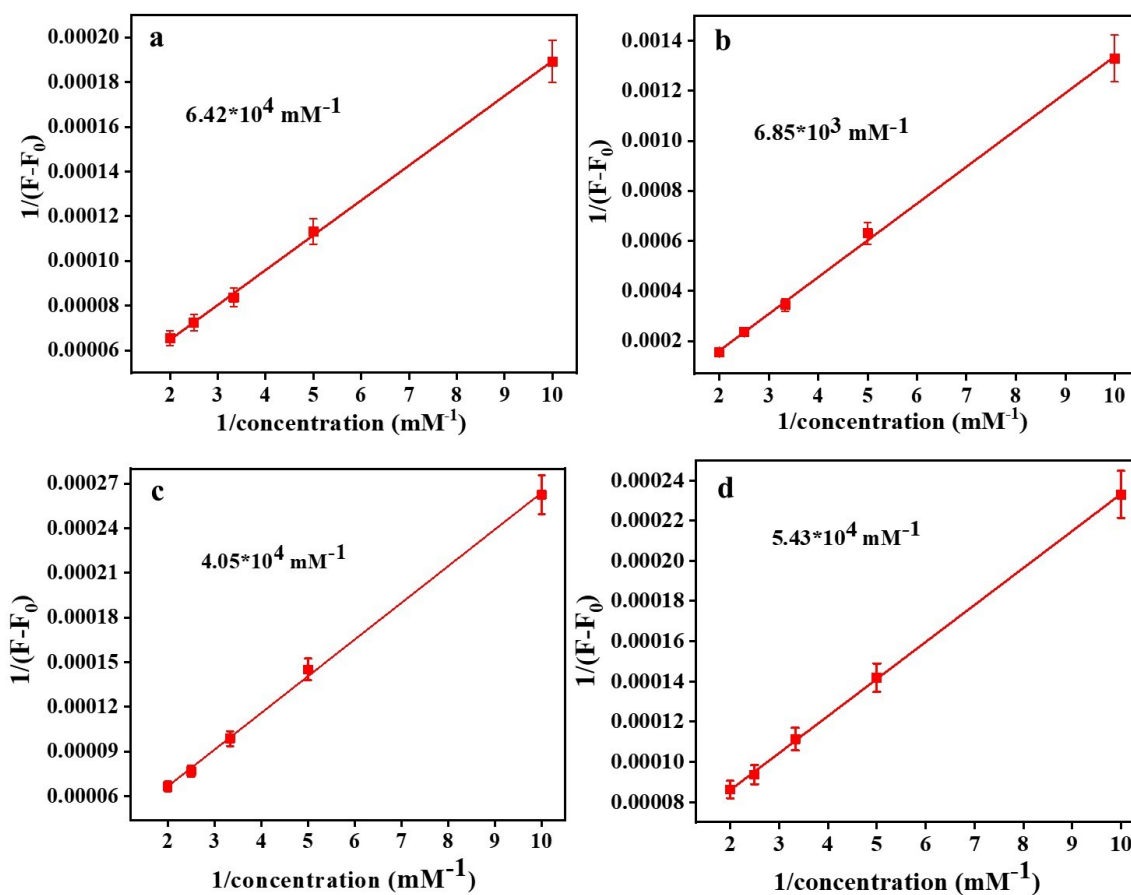

**Fig. S11.** B-H binding plot of (a) A-GQDs with  $\text{Mn}^{2+}$ , (b) B-GQDs with  $\text{Mn}^{2+}$ , (c) A-GQDs with  $\text{Mn}^{7+}$ , and (d) B-GQDs with  $\text{Mn}^{7+}$  in presence of GSH.



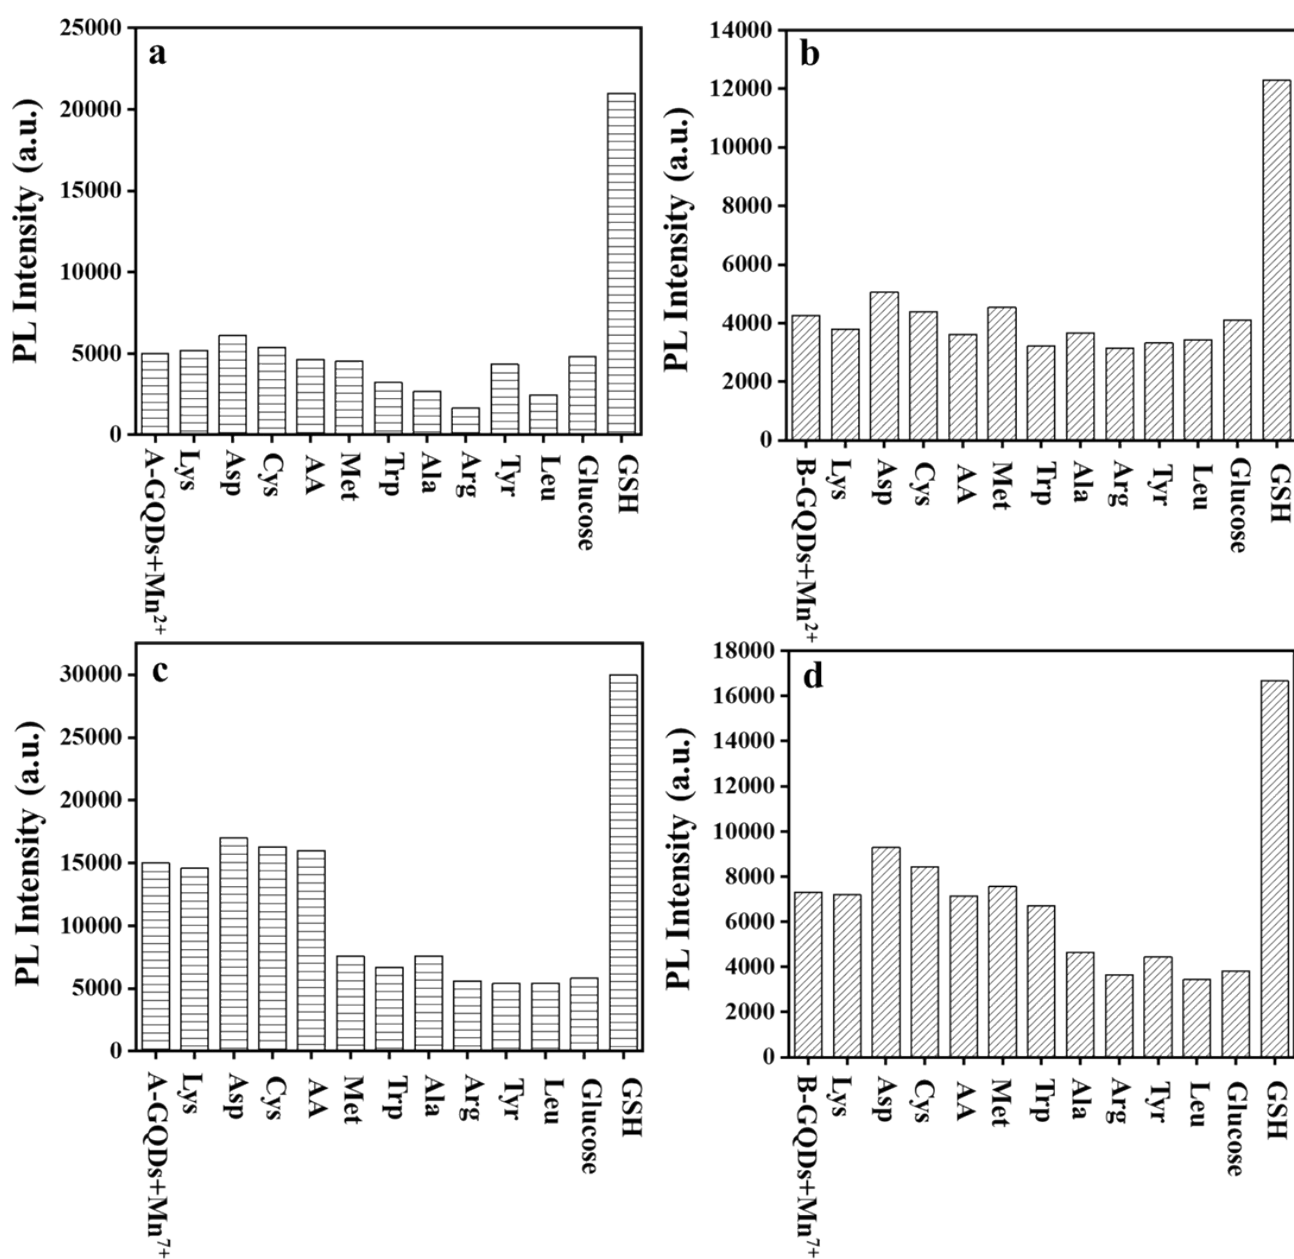

**Fig. S12.** Fluorescence response of (a) A-GQDs with Mn<sup>2+</sup>, (b) B-GQDs with Mn<sup>2+</sup>, (c) A-GQDs with Mn<sup>7+</sup>, and (d) B-GQDs with Mn<sup>7+</sup> as a sensing system towards various analytes.

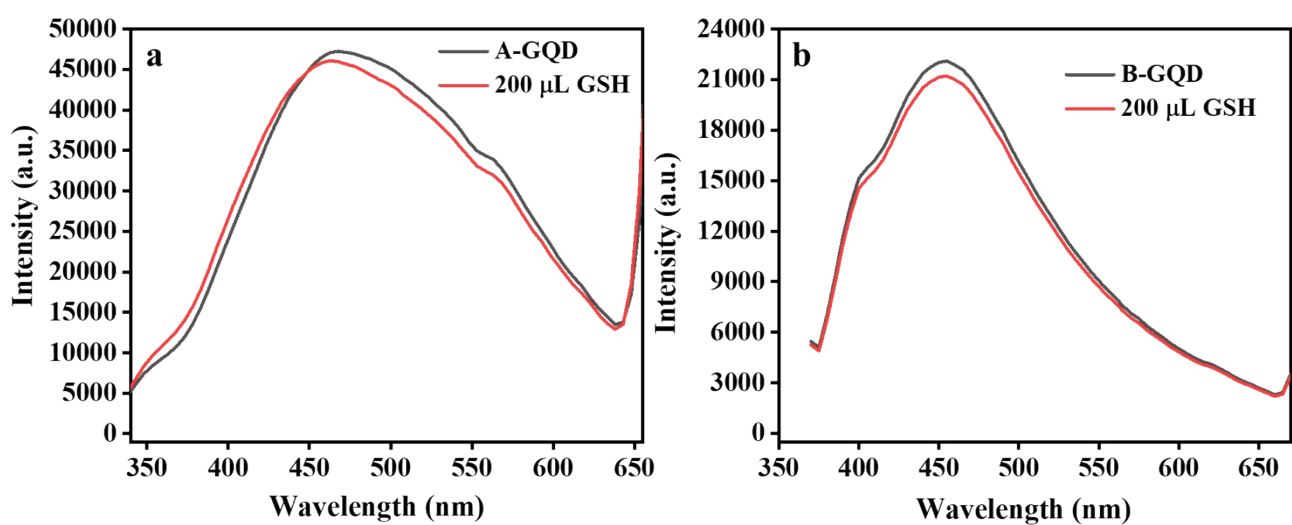

**Fig. S13.** Fluorescence response of (a) A-GQDs, (b) B-GQDs in presence of GSH.

**Table S1.**

Final turn on percentage of different systems after the GSH addition.

|            | A-GQDs+Mn <sup>2+</sup> | B-GQDs+Mn <sup>7+</sup> | A-GQDs+Mn <sup>2+</sup> | B-GQDs+Mn <sup>7+</sup> |
|------------|-------------------------|-------------------------|-------------------------|-------------------------|
| <b>GSH</b> | 69.6%                   | 65.5%                   | 45.1%                   | 54.1%                   |
